# Supplementary material for: Clinical Guidance on the Monitoring and Management of Trastuzumab Deruxtecan (T-DXd)-Related Adverse Events: Insights from an Asia-Pacific Multidisciplinary Panel
Source: PubMed Central journal article supplement — Drug Saf. 2023 Aug 8;46(10):927–49. doi: 10.1007/s40264-023-01328-x (PMC10584766; doi:10.1007/s40264-023-01328-x), 2023-08-08
Supplement: 40264_2023_1328_MOESM1_ESM.pdf [file 40264_2023_1328_MOESM1_ESM.pdf]

## Electronic supplementary information 1 – Search Queries for Literature Review

**Article title:** Clinical guidance on the monitoring and management of trastuzumab deruxtecan (T-DXd)-related adverse events: Insights from an Asia-Pacific multidisciplinary panel

**Journal name:** Drug Safety

**Author names and affiliations:** Joanne Wing Yan Chiu<sup>1</sup>, Soo Chin Lee<sup>2</sup>, James Chung-man Ho<sup>1</sup>, Yeon Hee Park<sup>3</sup>, Ta-Chung Chao<sup>4</sup>, Sung-Bae Kim<sup>5</sup>, Elgene Lim<sup>6</sup>, Ching-Hung Lin<sup>7</sup>, Sherene Loi<sup>8,9</sup>, Su Ying Low<sup>10</sup>, Lynette Li San Teo<sup>11</sup>, Winnie Yeo<sup>12</sup>, Rebecca Dent<sup>13</sup>

1-The University of Hong Kong, Hong Kong Special Administrative Region; 2-National University Cancer Institute Singapore, National University Health System, Singapore; 3-Samsung Medical Center, Sungkyunkwan University School of Medicine, South Korea; 4-Division of Medical Oncology, Department of Oncology, Taipei Veterans General Hospital; Faculty of Medicine, School of Medicine, National Yang Ming Chiao Tung University, Taipei, Taiwan; 5-Asan Medical Center, University of Ulsan College of Medicine, South Korea; 6-Garvan Institute of Medical Research and St Vincent's Clinical School, Faculty of Medicine and Health, University of New South Wales, New South Wales, Australia; 7-National Taiwan University Hospital, Cancer Center Branch, Taiwan; 8-Division of Cancer Research, Peter MacCallum Cancer Centre, Melbourne, Australia; 9-Sir Peter MacCallum Department of Medical Oncology, The University of Melbourne, Melbourne, Australia; 10-Department of Respiratory and Critical Care Medicine, Singapore General Hospital; 11-National University Hospital, Singapore; 12-The Chinese University of Hong Kong, Hong Kong Special Administrative Region; 13-National Cancer Centre Singapore, Singapore.

**Corresponding author emails:** jwychiu@hku.hk; rebecca.dent@duke-nus.edu.sg

### ESM1 File – Search queries for literature review

Relevant literature on trastuzumab deruxtecan (T-DXd), and reviews and guidelines on the monitoring and management of T-DXd-related adverse events were identified on PubMed (May 2022). The search terms below were used for the literature review. Guidelines from National Comprehensive Cancer Network were also reviewed.

#### Trastuzumab deruxtecan

Search term: (trastuzumab deruxtecan) OR (DS-8201) OR (T-DXd)

Articles were screened for their relevancy and the following were excluded from the review: Pediatric specific and articles other than English.

#### Interstitial lung disease (ILD) / pneumonitis

Search term: (interstitial lung disease) AND (guidelines) AND ("2012"[Date - Publication] : "3000"[Date - Publication]) AND ("review"[Publication Type] OR "guideline"[Publication Type])

Articles were screened for their relevancy and the following were excluded from the review: Pediatric specific; Familial pulmonary fibrosis; Hypersensitivity pneumonitis; Rheumatoid arthritis induced ILD; Myositis; Sarcoidosis; Sjogren Syndrome; Polyangiitis; and articles other than English.

#### Nausea and vomiting

Search term: ((nausea) OR (vomiting)) AND (guidelines) AND ((cancer) OR (oncology) OR (chemotherapy) OR (cancer-related)) AND (management) AND ("2012"[Date - Publication] : "3000"[Date - Publication]) AND ("review"[Publication Type] OR "guideline"[Publication Type])

Articles were screened for their relevancy and the following were excluded from the review: Pediatric specific; surgery or postoperative associated nausea and vomiting; and articles other than English.

#### Neutropenia

Search term: (neutropenia) AND (guidelines) AND (cancer OR oncology OR chemotherapy OR cancer-related) AND (management) AND ("2012"[Date - Publication] : "3000"[Date - Publication]) AND ("review"[Publication Type] OR "guideline"[Publication Type])

Articles were screened for their relevancy and the following were excluded from the review: Pediatric specific and articles other than English.

#### Anemia

Search term: (anemia) AND (guidelines) AND ((cancer) OR (oncology) OR (chemotherapy) OR (cancer-related)) AND (management) AND ("2012"[Date - Publication] : "3000"[Date - Publication]) AND ("review"[Publication Type] OR "guideline"[Publication Type])

Articles were screened for their relevancy and the following were excluded from the review: Pediatric specific and articles other than English.

#### Thrombocytopenia

Search term: (thrombocytopenia) AND (guidelines) AND ((cancer) OR (oncology) OR (chemotherapy) OR (cancer-related)) AND (management) AND ("2012"[Date - Publication] : "3000"[Date - Publication]) AND ("review"[Publication Type] OR "guideline"[Publication Type])

Articles were screened for their relevancy and the following were excluded from the review: Pediatric specific; immune thrombocytopenia; vaccine-induced thrombocytopenia; venous thromboembolism; liver disease associated thrombocytopenia; and articles other than English.

#### Fatigue

Search term: (fatigue) AND (guidelines) AND ((cancer) OR (oncology) OR (chemotherapy) OR (cancer-related)) AND (management) AND ("2012"[Date - Publication] : "3000"[Date - Publication]) AND ("review"[Publication Type] OR "guideline"[Publication Type])

Articles were screened for their relevancy and the following were excluded from the review: Pediatric specific; coronavirus disease 2019; and articles other than English.

#### Alopecia

Search term: (alopecia) AND (guidelines) AND ((cancer) OR (oncology) OR (chemotherapy) OR (cancer-related)) AND (management) AND ("2012"[Date - Publication] : "3000"[Date - Publication]) AND ("review"[Publication Type] OR "guideline"[Publication Type])

Articles were screened for their relevancy and the following were excluded from the review: Pediatric specific; alopecia areata; and articles other than English.
